# Supplementary material for: ALAIN01—Alemtuzumab in autoimmune inflammatory neurodegeneration: mechanisms of action and neuroprotective potential
Source: BMC Neurol. 2016 Mar 10;16:34. doi: 10.1186/s12883-016-0556-9 (PMC4785638; doi:10.1186/s12883-016-0556-9)
Supplement: Additional file 1: — Assessment Schedule. (DOCX 42 kb) [file 12883_2016_556_MOESM1_ESM.docx]

## Assessment Schedule, Flow Chart

|  |  | Scree-ning | Base-line | Month | | | | | | | | | | | | Unscheduled | |
| --- | --- | --- | --- | --- | --- | --- | --- | --- | --- | --- | --- | --- | --- | --- | --- | --- | --- |
| 3 | 6 | 9 | 12 | 15 | 18 | 21 | 24 | 27 | 30 | 33 | 36 | Re-lapse | Dis-cont. |
|  | Informed consent | x |  |  |  |  |  |  |  |  |  |  |  |  |  |  |  |
| Demographic data | X |  |  |  |  |  |  |  |  |  |  |  |  |  |  |  |
| **Safety assessments** | Medical history, concomitant diseases | x |  |  |  |  |  |  |  |  |  |  |  |  |  |  |  |
| Concomitant medication | x | X | x1 | x | x1 | x | x1 | x | x1 | x | x1 | x | x1 | x | X | x |
| Adverse Events | x | x | x1 | x | x1 | x | x1 | x | x1 | x | x1 | x | x1 | x | X | x |
| Vital signs | x |  | x1 | x | x1 | x | x1 | x | x1 | x | x1 | x | x1 | x | X | x |
| Physical examination | x |  | x1 | x | x1 | x | x1 | x | x1 | x | x1 | x | x1 | x | X | x |
| Blood pregnancy test | x |  |  |  |  |  |  |  |  |  |  |  |  |  |  |  |
| Blood or urine dipstick pregnancy test | Prior to each cycle of alemtuzumab and each MRI.  Blood test: within 3 days prior to each date. Urine test: on the respective date. | | | | | | | | | | | | | | | |
| Clinical chemistry2 | x |  | x1 | x | x1 | x | x1 | x | x1 | x | x1 | x | x1 | x |  | x |
| Creatinine | x |  | At least monthly | | | | | | | | | | | |  | x |
| Hematology3 | x |  | At least monthly | | | | | | | | | | | |  | x |
| Urinalysis4 | X |  | At least monthly | | | | | | | | | | | |  | X |
| Thyroid function5 | x |  | At least quarterly | | | | | | | | | | | |  | x |
| Basic lymphocyte phenotyping | x |  | x1 | x | x1 | x | x1 | x | x1 | x | x1 | x | x1 | x |  | x |
| Markers of autoimmunity6 |  | x |  | x |  | x |  | x |  | x |  | x |  | x |  | x |
| Screening for HIV, hepatitis B and C | x |  |  |  |  | x |  |  |  |  |  |  |  |  |  |  |
| Screening for HCMV, EBV, VZV | x |  |  |  |  | x |  |  |  |  |  |  |  |  |  |  |
| Cervical smear (cytology, HPV screening)) | X |  |  |  |  | x |  |  |  | x |  |  |  | x |  |  |
| Test for tuberculosis7 | X |  |  |  |  |  |  |  |  |  |  |  |  |  |  |  |
| **Efficacy assessments** | Blood sampling for efficacy assessments8 |  | x |  | x1 |  | x |  | x1 |  | x |  | x1 |  | x |  | x |
| CSF sampling9 |  | x1 |  |  |  | x1 |  |  |  | x1 |  |  |  | x1 |  | x1 |
| IL-21 expression |  | x |  |  |  | x |  |  |  | x |  |  |  | x |  | x |
| Expanded Disability Status Scale (EDSS) | x | x | x1 | x1 | x1 | x | x1 | x1 | x1 | x | x1 | x1 | x1 | x | X | x |
| Multiple Sclerosis Functional Composite (MSFC) |  | x | x1 | x1 | x1 | x | x1 | x1 | x1 | x | x1 | x1 | x1 | x |  | x |
| Quality of life (FAMS, EQ-5D, SF-36) |  | x | X1 | X1 | X1 | X | X1 | X1 | X1 | X | X1 | X1 | X1 | X |  | x |
| Fatigue Score (FSMC) |  | x | x1 | x1 | x1 | x | x1 | x1 | x1 | x | x1 | x1 | x1 | x |  | x |
| Optical Coherence tomography (OCT) |  | x |  | x1 |  | x |  | x1 |  | x |  | x1 |  | x |  | x |
| Evoked potentials (VEP, SEP, MEP) |  | x |  | x1 |  | x |  | x1 |  | x |  | x1 |  | x |  | x |
| MRI | x10 | x11 |  | x1 |  | x |  | x1 |  | x |  | x1 |  | x |  | x |
| Inclusion and exclusion criteria | x |  |  |  |  |  |  |  |  |  |  |  |  |  |  |  |
| Criteria for treatment deferral |  |  |  |  |  | X |  |  |  |  |  |  |  |  |  |  |
| Administration of trial medication (premedication: methylprednisolone) |  | x |  |  |  | x |  |  |  |  |  |  |  |  |  |  |
| Start of anti-infective prophylaxis |  | x |  |  |  | x |  |  |  |  |  |  |  |  |  |  |
| Recent symptoms prior to relapse |  |  |  |  |  |  |  |  |  |  |  |  |  |  | x |  |
| Supportive laboratory testing in case of suspected relapse12 |  |  |  |  |  |  |  |  |  |  |  |  |  |  | X |  |
| Determination whether patient had relapse |  |  |  |  |  |  |  |  |  |  |  |  |  |  | x |  |
|  | Diary delivery and/or collection | x | x | x1 | x | x1 | x | x1 | x | x1 | x | x1 | x | x1 | x | x | x |
| Patient alert card delivery/renewal |  | x |  |  |  | x |  |  |  |  |  |  |  | x |  | x |

1 Not mandatory

2 Clinical chemistry: sodium, potassium, ALT, AST, glucose

3 Hematology CBC with platelet count; differential WBC, Hgb, Hct,

4 Urinalysis: colour, appearance, specific gravity, pH, protein, glucose, ketones, bilirubin, hemoglobin

5 Thyroid function: TSH, free T3, free T4, anti-TSHR, anti-TPO antibodies

6 ANA, cANCA, pANCA, anti-dsDNA, anti-TSHR, anti-TPO, RF, anti-CCP, anti-GBM, anti-platelet antibodies

7 2 interferon-gamma release assays (QuantiFERON®-TB Gold In-Tube test, T-SPOT®.TB test)

8 Blood efficacy assessments: Identification and quantification of immune cell populations, functional characterization of T cell subsets, concentration of neurotrophic factors

9 CSF-lymphocyte phenotyping: Functional characterization of T cell subsets, concentration of neurotrophic factors, evaluation of markers for neurodegeneration, effects of supernatant samples on neuroactivity

10 If previous MRI is not available to assess inclusion criteria

11 Not mandatory if already performed within 3 month prior initiation of Lemtrada®, provided that the MRI fulfils the study specific requirements and the patient is clinically stable (no new symptoms for at least 3 months and no therapy for a relapse) within this time period

12 CRP, leukocytes, urine testing for infections
